# Supplementary material for: -196 to -174del, rs4696480, rs3804099 polymorphisms of Toll-like receptor 2 gene impact the susceptibility of cancers: evidence from 37053 subjects
Source: PubMed Central journal article supplement (PMC6900473; doi:10.1042/bsr20191698), 2019-12-06
Supplement: BSR-2019-1698_supp.pdf [file BSR-2019-1698_supp.pdf]

|           |                                 |      |   |   |   |   |   |    |   |    |
|-----------|---------------------------------|------|---|---|---|---|---|----|---|----|
| rs3804099 | Tongtawee <i>et al.</i>         | 2018 | * | * |   |   | * | *  | * | NA |
| rs3804100 | Purdu <i>et al.</i>             | 2008 | * |   | * | * | * |    | * | NA |
| rs3804100 | Etokebe <i>et al.</i>           | 2009 | * | * | * | * |   | *  | * | NA |
| rs3804100 | Xie <i>et al.</i>               | 2012 | * | * |   |   | * | *  | * | NA |
| rs3804100 | Miedema <i>et al.</i>           | 2012 | * | * | * | * |   | ** | * | NA |
| rs3804100 | Castaña-Rodríguez <i>et al.</i> | 2014 | * | * |   |   | * | *  | * | NA |
| rs3804100 | Semlali <i>et al.</i>           | 2017 | * | * | * | * | * | *  | * | NA |
| rs3804100 | Semlali <i>et al.</i>           | 2018 | * | * | * | * | * | *  | * | NA |
| rs3804100 | Tongtawee <i>et al.</i>         | 2018 | * | * |   |   | * | *  | * | NA |
| rs4696480 | Miedema <i>et al.</i>           | 2012 | * | * | * | * |   | ** | * | NA |
| rs4696480 | Gallo <i>et al.</i>             | 2017 | * | * | * | * |   | *  | * | NA |
| rs4696480 | Semlali <i>et al.</i>           | 2017 | * | * | * | * | * | *  | * | NA |
| rs4696480 | Semlali <i>et al.</i>           | 2018 | * | * | * | * | * | *  | * | NA |
| rs5743708 | Nischalk <i>et al.</i>          | 2011 | * |   | * | * |   | *  | * | NA |
| rs5743708 | Slattery <i>et al.</i>          | 2012 | * | * | * | * | * | *  | * | NA |
| rs5743708 | Slattery <i>et al.</i>          | 2012 | * | * | * | * | * | *  | * | NA |
| rs5743708 | Kma <i>et al.</i>               | 2018 | * | * | * | * | * | *  | * | NA |
| rs1898830 | Xie <i>et al.</i>               | 2012 | * | * |   |   | * | *  | * | NA |
| rs1898830 | Slattery <i>et al.</i>          | 2012 | * | * | * | * | * | *  | * | NA |
| rs1898830 | Slattery <i>et al.</i>          | 2012 | * | * | * | * | * | *  | * | NA |

This table identifies “high” quality choices with a “star”. A study can be awarded a maximum of 1 star for each numbered item within the Selection and Exposure categories. A

maximum of 2 stars can be given for Comparability. \*, Yes; NA, not applicable. ([http://www.ohri.ca/programs/clinical\\_epidemiology/oxford.htm](http://www.ohri.ca/programs/clinical_epidemiology/oxford.htm)).

**Supplementary table 2. Details of the sensitivity analyses for *TLR2* polymorphism and cancer risk.**

| <b>SNP</b>                   | <b>Comparison</b>               | <b>Study omitted</b>            | <b>Estimate (95% Confident Interval)</b> | <b>Effect Model</b> |
|------------------------------|---------------------------------|---------------------------------|------------------------------------------|---------------------|
| (-196 to -174del)            | B vs. A                         | Tahara et al. (2007)            | 1.3842176 (1.0833399-1.7686585)          | Random              |
|                              |                                 | Pandey et al. (2009)            | 1.3852967 (1.0883054-1.7633349)          |                     |
|                              |                                 | Hishida et al. (2010)           | 1.4153796 (1.0891982-1.8392425)          |                     |
|                              |                                 | Srivastava et al. (2010)        | 1.3988788 (1.0941139-1.7885357)          |                     |
|                              |                                 | Zeng et al. (2011a)             | 1.4531407 (1.1535394-1.8305556)          |                     |
|                              |                                 | Nischalk et al. (2011)          | 1.3801254 (1.0811518-1.761775)           |                     |
|                              |                                 | Oliveira et al. (2012)          | 1.3466114 (1.0639657-1.7043427)          |                     |
|                              |                                 | Mandal et al. (2012)            | 1.389533 (1.0895275-1.7721463)           |                     |
|                              |                                 | Theodoropoulos et al. (2012)    | 1.2380068 (1.0824547-1.4159125)          |                     |
|                              |                                 | Singh et al. (2013)             | 1.4060576 (1.1006653-1.7961845)          |                     |
|                              |                                 | Bi et al. (2014)                | 1.4226668 (1.1177661-1.8107371)          |                     |
|                              |                                 | Castano-Rodriguez et al. (2014) | 1.4321136 (1.1263661-1.8208549)          |                     |
|                              |                                 | Zidi et al. (2014)              | 1.4113173 (1.1074009-1.798641)           |                     |
|                              |                                 | Devi et al. (2015)              | 1.3978628 (1.0823373-1.8053708)          |                     |
|                              |                                 | Proenca et al. (2015)           | 1.3872203 (1.0892484-1.7667044)          |                     |
|                              |                                 | Zidi et al. (2015)              | 1.4134914 (1.1091279-1.8013773)          |                     |
|                              |                                 | AL-Harras et al. (2016)         | 1.4114381 (1.109862-1.7949597)           |                     |
|                              |                                 | Huang et al. (2018)             | 1.3877288 (1.0831736-1.7779155)          |                     |
|                              |                                 | Combined                        | 1.3920354(1.1039533-1.7552939)           |                     |
|                              |                                 | BB vs. AA                       |                                          |                     |
| Pandey et al. (2009)         | 1.6689134 (1.1418774-2.4392042) |                                 |                                          |                     |
| Hishida et al. (2010)        | 1.8226418 (1.1751486-2.8268964) |                                 |                                          |                     |
| Srivastava et al. (2010)     | 1.7162418 (1.1617243-2.5354433) |                                 |                                          |                     |
| Zeng et al. (2011a)          | 1.8692523 (1.3004427-2.6868577) |                                 |                                          |                     |
| Nischalk et al. (2011)       | 1.6466268 (1.1200988-2.4206614) |                                 |                                          |                     |
| Oliveira et al. (2012)       | 1.6287422 (1.1182092-2.372366)  |                                 |                                          |                     |
| Mandal et al. (2012)         | 1.7230891 (1.1648878-2.5487742) |                                 |                                          |                     |
| Theodoropoulos et al. (2012) | 1.4391873 (1.0632966-1.9479607) |                                 |                                          |                     |
| Singh et al. (2013)          | 1.7411302 (1.1714258-2.5879016) |                                 |                                          |                     |
| Bi et al. (2014)             | 1.7911378 (1.2046455-2.6631689) |                                 |                                          |                     |

|              |                                 |                                 |        |
|--------------|---------------------------------|---------------------------------|--------|
|              | Castano-Rodriguez et al. (2014) | 1.7924392 (1.2086339-2.6582394) |        |
|              | Zidi et al. (2014)              | 1.7909669 (1.1981788-2.6770315) |        |
|              | Devi et al. (2015)              | 1.7879089 (1.1870695-2.6928654) |        |
|              | Proenca et al. (2015)           | 1.7214299 (1.1655397-2.5424454) |        |
|              | Zidi et al. (2015)              | 1.8113037 (1.217249-2.6952751)  |        |
|              | AL-Harras et al. (2016)         | 1.7418679 (1.1769091-2.5780275) |        |
|              | Huang et al. (2018)             | 1.6676577 (1.1255744-2.4708116) |        |
|              | Combined                        | 1.7159047(1.1779598-2.4995155)  |        |
| BA vs. AA    | Tahara et al. (2007)            | 1.4379952 (1.1013559-1.8775312) | Random |
|              | Pandey et al. (2009)            | 1.4099357 (1.0802039-1.8403181) |        |
|              | Hishida et al. (2010)           | 1.4325813 (1.0812083-1.8981441) |        |
|              | Srivastava et al. (2010)        | 1.4125484 (1.0770715-1.8525165) |        |
|              | Zeng et al. (2011a)             | 1.475433 (1.1450467-1.9011475)  |        |
|              | Nischalk et al. (2011)          | 1.4035684 (1.0712777-1.8389293) |        |
|              | Oliveira et al. (2012)          | 1.3656155 (1.0514834-1.7735951) |        |
|              | Mandal et al. (2012)            | 1.4033546 (1.0730686-1.8353013) |        |
|              | Theodoropoulos et al. (2012)    | 1.249367 (1.0883496-1.4342062)  |        |
|              | Singh et al. (2013)             | 1.4239892 (1.088258-1.8632944)  |        |
|              | Bi et al. (2014)                | 1.446191 (1.112655-1.8797095)   |        |
|              | Castano-Rodriguez et al. (2014) | 1.4140229 (1.0890495-1.8359689) |        |
|              | Zidi et al. (2014)              | 1.4204854 (1.0901513-1.8509163) |        |
|              | Devi et al. (2015)              | 1.400021 (1.0571072-1.8541719)  |        |
|              | Proenca et al. (2015)           | 1.4025673 (1.0742663-1.8311986) |        |
|              | Zidi et al. (2015)              | 1.404094 (1.0766704-1.8310896)  |        |
|              | AL-Harras et al. (2016)         | 1.4375898 (1.1057117-1.8690807) |        |
|              | Huang et al. (2018)             | 1.4095417 (1.0742522-1.8494798) |        |
|              | Combined                        | 1.4082073(1.0920892-1.8158295)  |        |
| BB+BA vs. AA | Tahara et al. (2007)            | 1.4584963 (1.0969443-1.9392155) | Random |
|              | Pandey et al. (2009)            | 1.4463475 (1.0912107-1.9170641) |        |
|              | Hishida et al. (2010)           | 1.4739951 (1.0930413-1.9877213) |        |
|              | Srivastava et al. (2010)        | 1.4542896 (1.0920157-1.936747)  |        |
|              | Zeng et al. (2011a)             | 1.5263284 (1.1706467-1.9900784) |        |
|              | Nischalk et al. (2011)          | 1.4389279 (1.0814754-1.9145266) |        |

|               |                                 |                                  |                                  |        |
|---------------|---------------------------------|----------------------------------|----------------------------------|--------|
|               | Oliveira et al. (2012)          | 1.4002185 (1.0623446-1.8455516)  |                                  |        |
|               | Mandal et al. (2012)            | 1.4452412 (1.0879238-1.919916)   |                                  |        |
|               | Theodoropoulos et al. (2012)    | 1.2812951 (1.1065357-1.4836549)  |                                  |        |
|               | Singh et al. (2013)             | 1.4650761 (1.102227-1.9473739)   |                                  |        |
|               | Bi et al. (2014)                | 1.488794 (1.1273342-1.9661493)   |                                  |        |
|               | Castano-Rodriguez et al. (2014) | 1.4664143 (1.1123278-1.9332169)  |                                  |        |
|               | Zidi et al. (2014)              | 1.4689747 (1.108464-1.9467359)   |                                  |        |
|               | Devi et al. (2015)              | 1.4457284 (1.0732414-1.9474938)  |                                  |        |
|               | Proenca et al. (2015)           | 1.444193 (1.0888978-1.9154172)   |                                  |        |
|               | Zidi et al. (2015)              | 1.4631933 (1.1032976-1.9404868)  |                                  |        |
|               | AL-Harras et al. (2016)         | 1.4769711 (1.117746-1.9516453)   |                                  |        |
|               | Huang et al. (2018)             | 1.4438585 (1.083371-1.9242967)   |                                  |        |
|               | Combined                        | 1.4489661(1.1069692-1.8966225)   |                                  |        |
| BB vs. BA+ AA | Tahara et al. (2007)            | 1.4057066 (1.0187438-1.9396546)  | Random                           |        |
|               | Pandey et al. (2009)            | 1.4802103 (1.0636408-2.059927)   |                                  |        |
|               | Hishida et al. (2010)           | 1.6088248 (1.0950637-2.3636229)  |                                  |        |
|               | Srivastava et al. (2010)        | 1.5170711 (1.0795485-2.1319141)  |                                  |        |
|               | Zeng et al. (2011a)             | 1.6309656 (1.171002-2.2716002)   |                                  |        |
|               | Nischalk et al. (2011)          | 1.4562807 (1.0420877-2.0351007)  |                                  |        |
|               | Oliveira et al. (2012)          | 1.4511319 (1.0456713-2.0138106)  |                                  |        |
|               | Mandal et al. (2012)            | 1.5216708 (1.0817105-2.1405747)  |                                  |        |
|               | Theodoropoulos et al. (2012)    | 1.3125212 (0.99935091-1.7238308) |                                  |        |
|               | Singh et al. (2013)             | 1.5333456 (1.085434-2.166091)    |                                  |        |
|               | Bi et al. (2014)                | 1.5650365 (1.1045121-2.2175758)  |                                  |        |
|               | Castano-Rodriguez et al. (2014) | 1.6183692 (1.1438998-2.2896402)  |                                  |        |
|               | Zidi et al. (2014)              | 1.5730888 (1.1077236-2.2339582)  |                                  |        |
|               | Devi et al. (2015)              | 1.5849385 (1.1106908-2.2616825)  |                                  |        |
|               | Proenca et al. (2015)           | 1.5190281 (1.0813057-2.1339443)  |                                  |        |
|               | Zidi et al. (2015)              | 1.5942779 (1.1277677-2.2537639)  |                                  |        |
|               | AL-Harras et al. (2016)         | 1.5282739 (1.0857635-2.1511326)  |                                  |        |
|               | Huang et al. (2018)             | 1.4761039 (1.0477762-2.0795305)  |                                  |        |
|               | Combined                        | 1.5166734(1.0916522-2.1071714)   |                                  |        |
| rs3804099     | B vs. A                         | Etokebe et al. (2009)            | 0.96889651(0.79311037-1.1836442) | Random |

|              |                         |                                   |        |
|--------------|-------------------------|-----------------------------------|--------|
|              | Xie et al. (2012)       | 0.92676383(0.7667833-1.1201224)   |        |
|              | Miedema et al. (2012)   | 0.95441699(0.77630502-1.1733943)  |        |
|              | Slattery et al. (2012)  | 0.96444345(0.76220924-1.2203357)  |        |
|              | Zeljic et al. (2013)    | 0.90798628(0.77780855-1.0599512)  |        |
|              | Semlali et al. (2017)   | 0.98396611(0.80367553-1.2047018)  |        |
|              | Semlali et al. (2018)   | 1.0058529(0.83297974-1.2146034)   |        |
|              | Tongtawee et al. (2018) | 1.0002049(0.82552308-1.2118498)   |        |
|              | Zeng et al. (2011b)     | 1.007781(0.83084249-1.2224008)    |        |
|              | Combined                | 0.96741525(0.805536-1.1618255)    |        |
| BB vs. AA    | Etokebe et al. (2009)   | 0.83248496(0.58359981-1.1875111)  | Random |
|              | Xie et al. (2012)       | 0.83050156(0.57751393-1.1943139)  |        |
|              | Miedema et al. (2012)   | 0.79650563(0.55756348-1.1378456)  |        |
|              | Slattery et al. (2012)  | 0.82188183(0.54482174-1.2398363)  |        |
|              | Zeljic et al. (2013)    | 0.83790469(0.67976439-1.0328348)  |        |
|              | Semlali et al. (2017)   | 0.86173928(0.59840006-1.2409668)  |        |
|              | Semlali et al. (2018)   | 0.89638388(0.64419699-1.2472955)  |        |
|              | Tongtawee et al. (2018) | 0.87157202(0.60786855-1.2496743)  |        |
|              | Zeng et al. (2011b)     | 0.89229125(0.62907434-1.2656432)  |        |
|              | Combined                | 0.84045512(0.60901101-1.1598556)  |        |
| BA vs. AA    | Etokebe et al. (2009)   | 0.82675534(0.71513367-0.95579952) | FIXED  |
|              | Xie et al. (2012)       | 0.84389544(0.73035383-0.97508842) |        |
|              | Miedema et al. (2012)   | 0.8227998(0.70942289-0.95429611)  |        |
|              | Slattery et al. (2012)  | 0.72886878(0.60421723-0.87923628) |        |
|              | Zeljic et al. (2013)    | 0.83129221(0.71871334-0.96150529) |        |
|              | Semlali et al. (2017)   | 0.83012533(0.71732771-0.96066004) |        |
|              | Semlali et al. (2018)   | 0.83351672(0.72058511-0.96414721) |        |
|              | Tongtawee et al. (2018) | 0.83189094(0.7195071-0.96182865)  |        |
|              | Zeng et al. (2011b)     | 0.86057824(0.73464006-1.0081059)  |        |
|              | Combined                | 0.8265341(0.71730049-0.95240227)  |        |
| BB+BA vs. AA | Etokebe et al. (2009)   | 0.84955496(0.74180108-0.97296107) | FIXED  |
|              | Xie et al. (2012)       | 0.85593086(0.74777192-0.97973406) |        |
|              | Miedema et al. (2012)   | 0.84141642(0.7326141-0.96637726)  |        |
|              | Slattery et al. (2012)  | 0.76597619(0.64349884-0.91176468) |        |

|           |               |                                 |                                   |        |
|-----------|---------------|---------------------------------|-----------------------------------|--------|
|           |               | Zeljic et al. (2013)            | 0.83369786(0.72757339-0.9553017)  |        |
|           |               | Semlali et al. (2017)           | 0.856233(0.74684209-0.98164654)   |        |
|           |               | Semlali et al. (2018)           | 0.86472785(0.75451595-0.99103838) |        |
|           |               | Tongtawee et al. (2018)         | 0.86316466(0.75228989-0.99038053) |        |
|           |               | Zeng et al. (2011b)             | 0.89538008(0.77273506-1.0374907)  |        |
|           |               | Combined                        | 0.84974157(0.74417662-0.97028139) |        |
|           | BB vs. BA+ AA | Etokebe et al. (2009)           | 0.98531634(0.75018847-1.2941391)  | Random |
|           |               | Slattery et al. (2012)          | 1.0224282(0.73720181-1.4180096)   |        |
|           |               | Xie et al. (2012)               | 0.90305895(0.71781307-1.1361111)  |        |
|           |               | Miedema et al. (2012)           | 0.95622373(0.72741711-1.2570007)  |        |
|           |               | Slattery et al. (2012)          | 0.99512035(0.7201038-1.375169)    |        |
|           |               | Zeljic et al. (2013)            | 0.96521997(0.77944446-1.195274)   |        |
|           |               | Semlali et al. (2017)           | 1.0094388(0.76200932-1.3372103)   |        |
|           |               | Semlali et al. (2018)           | 1.0407708(0.79820967-1.3570417)   |        |
|           |               | Tongtawee et al. (2018)         | 1.0242591(0.77977443-1.3453976)   |        |
|           |               | Zeng et al. (2011b)             | 1.0333945(0.78642559-1.3579214)   |        |
|           |               | Combined                        | 0.99117113(0.76757505-1.2799012)  |        |
| rs3804100 | B vs. A       | Purdu et al. (2008)             | 1.0509363(0.87773889-1.2583095)   | FIXED  |
|           |               | Etokebe et al. (2009)           | 1.0712918(0.94372904-1.216097)    |        |
|           |               | Xie et al. (2012)               | 1.023598(0.8918919-1.174753)      |        |
|           |               | Miedema et al. (2012)           | 1.0755367(0.94661063-1.2220222)   |        |
|           |               | Castano-Rodriguez et al. (2014) | 1.0826485(0.94917309-1.2348937)   |        |
|           |               | Semlali et al. (2017)           | 1.0897315(0.95792955-1.239668)    |        |
|           |               | Semlali et al. (2018)           | 1.0973544(0.96575099-1.2468916)   |        |
|           |               | Tongtawee et al. (2018)         | 1.098178(0.96446925-1.2504234)    |        |
|           |               | Combined                        | 1.0757035(0.94900288-1.2193197)   |        |
|           | BB vs. AA     | Purdu et al. (2008)             | 0.69224417(0.39371327-1.2171344)  | FIXED  |
|           |               | Etokebe et al. (2009)           | 0.82257968(0.51609141-1.3110803)  |        |
|           |               | Xie et al. (2012)               | 0.78167593(0.444442-1.3747964)    |        |
|           |               | Miedema et al. (2012)           | 0.79560041(0.49527037-1.2780495)  |        |
|           |               | Castano-Rodriguez et al. (2014) | 0.84008753(0.50456429-1.3987256)  |        |
|           |               | Semlali et al. (2017)           | 0.87610734(0.54209089-1.4159324)  |        |
|           |               | Semlali et al. (2018)           | 0.82225353(0.50898784-1.3283241)  |        |

|           |               |                                 |                                  |       |
|-----------|---------------|---------------------------------|----------------------------------|-------|
|           |               | Tongtawee et al. (2018)         | 0.92980087(0.57338297-1.5077701) |       |
|           |               | Combined                        | 0.82257966(0.51609141-1.3110803) |       |
|           | BA vs. AA     | Purdu et al. (2008)             | 0.95118934(0.74209517-1.2191983) | FIXED |
|           |               | Etokebe et al. (2009)           | 1.0331113(0.88734871-1.202818)   |       |
|           |               | Xie et al. (2012)               | 1.0672268(0.9164629-1.2427924)   |       |
|           |               | Miedema et al. (2012)           | 1.0441124(0.8955912-1.2172638)   |       |
|           |               | Castano-Rodriguez et al. (2014) | 1.0305344(0.88151097-1.2047508)  |       |
|           |               | Semlali et al. (2017)           | 1.0410093(0.8920272-1.2148736)   |       |
|           |               | Semlali et al. (2018)           | 1.0668006(0.91554779-1.2430412)  |       |
|           |               | Tongtawee et al. (2018)         | 1.0363233(0.88703543-1.2107363)  |       |
|           |               | Combined                        | 1.040501(0.89578847-1.2085915)   |       |
|           | BB+BA vs. AA  | Purdu et al. (2008)             | 0.93218386(0.73226815-1.1866783) | FIXED |
|           |               | Etokebe et al. (2009)           | 1.0282626(0.88614511-1.1931726)  |       |
|           |               | Xie et al. (2012)               | 1.0493138(0.90400296-1.2179821)  |       |
|           |               | Miedema et al. (2012)           | 1.0359852(0.8916021-1.2037492)   |       |
|           |               | Castano-Rodriguez et al. (2014) | 1.0301102(0.88389486-1.2005129)  |       |
|           |               | Semlali et al. (2017)           | 1.0422701(0.8959319-1.2125105)   |       |
|           |               | Semlali et al. (2018)           | 1.061036(0.9134236-1.2325029)    |       |
|           |               | Tongtawee et al. (2018)         | 1.0438291(0.89639461-1.215513)   |       |
|           |               | Combined                        | 1.0354481(0.89429472-1.1988809)  |       |
|           | BB vs. BA+ AA | Purdu et al. (2008)             | 1.3592938(0.97788465-1.889466)   | FIXED |
|           |               | Etokebe et al. (2009)           | 1.3427418(0.98680955-1.8270552)  |       |
|           |               | Xie et al. (2012)               | 0.76624233(0.43729138-1.3426455) |       |
|           |               | Miedema et al. (2012)           | 1.3311722(0.97659153-1.814494)   |       |
|           |               | Castano-Rodriguez et al. (2014) | 1.4226214(1.0304278-1.9640886)   |       |
|           |               | Semlali et al. (2017)           | 1.4013143(1.0246511-1.9164394)   |       |
|           |               | Semlali et al. (2018)           | 1.3562951(0.99298555-1.852531)   |       |
|           |               | Tongtawee et al. (2018)         | 1.4469726(1.0552281-1.9841487)   |       |
|           |               | Combined                        | 1.3427418(0.98680954-1.8270552)  |       |
| rs4696480 | B vs. A       | Miedema et al. (2012)           | 1.1666657(0.93330896-1.4583688)  | FIXED |
|           |               | Gallo et al. (2017)             | 1.1498516(0.94730139-1.3957106)  |       |
|           |               | Semlali et al. (2017)           | 1.2602687(1.0255111-1.5487664)   |       |
|           |               | Semlali et al. (2018)           | 1.2888148(1.0570656-1.5713724)   |       |



|           |               |                        |                                  |        |
|-----------|---------------|------------------------|----------------------------------|--------|
|           |               | Combined               | 1.2160064(1.0187157-1.4515055)   |        |
|           | BB vs. AA     | Miedema et al. (2012)  | 1.3694062(0.89078385-2.1051946)  | FIXED  |
|           |               | Gallo et al. (2017)    | 1.3104771(0.89652187-1.9155701)  |        |
|           |               | Semlali et al. (2017)  | 1.5451926(1.0297643-2.3186085)   |        |
|           |               | Semlali et al. (2018)  | 1.6503272(1.115391-2.4418161)    |        |
|           |               | Combined               | 1.4627797(1.0342395-2.0688868)   |        |
|           | BA vs. AA     | Miedema et al. (2012)  | 1.3224006(0.66976017-2.6109993)  | Random |
|           |               | Gallo et al. (2017)    | 1.1872793(0.77804178-1.8117695)  |        |
|           |               | Semlali et al. (2017)  | 1.6747332(0.99755496-2.8116057)  |        |
|           |               | Semlali et al. (2018)  | 1.5634577(0.83154303-2.9395955)  |        |
|           |               | Combined               | 1.4065839(0.86725762-2.2813039)  |        |
|           | BB+BA vs. AA  | Miedema et al. (2012)  | 1.3358485(0.72868836-2.4489083)  | Random |
|           |               | Gallo et al. (2017)    | 1.2201217(0.84528029-1.7611873)  |        |
|           |               | Semlali et al. (2017)  | 1.6279997(0.9715367-2.7280316)   |        |
|           |               | Semlali et al. (2018)  | 1.5861192(0.92640245-2.7156382)  |        |
|           |               | Combined               | 1.4149311(0.91863568-2.1793514)  |        |
|           | BB vs. BA+ AA | Miedema et al. (2012)  | 1.1666807(0.80948448-1.6814948)  | FIXED  |
|           |               | Gallo et al. (2017)    | 1.1461788(0.82732379-1.5879225)  |        |
|           |               | Semlali et al. (2017)  | 1.1172881(0.79788733-1.5645475)  |        |
|           |               | Semlali et al. (2018)  | 1.2501878(0.89752364-1.7414242)  |        |
|           |               | Combined               | 1.1693906(0.87195311-1.5682888)  |        |
| rs5743708 | B vs. A       | Nischalk et al. (2011) | 16.521536(11.041318-24.721792)   | Random |
|           |               | Kina et al. (2018)     | 0.98288077(0.51824826-1.8640767) |        |
|           |               | Combined               | 4.0756825(0.25461694-65.239915)  |        |
|           | BA vs. AA     | Nischalk et al. (2011) | 2.9571428(1.4962763-5.8443046)   | Random |
|           |               | Kina et al. (2018)     | 0.98214287(0.51079553-1.8884357) |        |
|           |               | Combined               | 1.6968818(0.57462964-5.0108935)  |        |
|           | BB+BA vs. AA  | Nischalk et al. (2011) | 2.2095497(0.50451875-9.6767654)  | Random |
|           |               | Slattery et al. (2012) | 2.4511757(0.53151315-11.304071)  |        |
|           |               | Slattery et al. (2012) | 2.0795665(0.33308411-12.983498)  |        |
|           |               | Kina et al.(2018)      | 1.0068018(0.73271269-1.3834208)  |        |
|           |               | Combined               | 1.8129221(0.57173252-5.7486434)  |        |

|                        |                        |                                  |                                  |        |
|------------------------|------------------------|----------------------------------|----------------------------------|--------|
| rs1898830              | B vs. A                | Xie et al. (2012)                | 1.0188407(0.93886125-1.1056333)  | FIXED  |
|                        |                        | Slattery et al. (2012)           | 0.9835791(0.89551055-1.0803088)  |        |
|                        |                        | Slattery et al. (2012)           | 1.0013056(0.88363576-1.134645)   |        |
|                        |                        | Combined                         | 1.0030393(0.9276129-1.0845988)   |        |
|                        | BB vs. AA              | Xie et al. (2012)                | 1.0031921(0.83704913-1.2023121)  | FIXED  |
|                        |                        | Slattery et al. (2012)           | 0.92918319(0.75771797-1.1394496) |        |
|                        |                        | Slattery et al. (2012)           | 0.9231993(0.70171112-1.2145981)  |        |
|                        |                        | Combined                         | 0.96050464(0.80895557-1.1404448) |        |
|                        | BA vs. AA              | Xie et al. (2012)                | 1.0563735(0.94049549-1.1865287)  | Random |
|                        |                        | Slattery et al. (2012)           | 0.80378997(0.4504793-1.4342021)  |        |
|                        |                        | Slattery et al. (2012)           | 0.82878494(0.42668638-1.6098112) |        |
|                        |                        | Combined                         | 0.97101493(0.76821406-1.2273532) |        |
|                        | BB+BA vs. AA           | Xie et al. (2012)                | 1.0449898(0.93609422-1.1665533)  | Random |
| Slattery et al. (2012) |                        | 0.82465678(0.4953464-1.3728954)  |                                  |        |
| Slattery et al. (2012) |                        | 0.84786361(0.46967152-1.5305862) |                                  |        |
| Combined               |                        | 0.97508254(0.79100631-1.2019954) |                                  |        |
| BB vs. BA+ AA          | Xie et al. (2012)      | 0.97547317(0.82177967-1.1579112) | FIXED                            |        |
|                        | Slattery et al. (2012) | 0.97476375(0.81043571-1.1724118) |                                  |        |
|                        | Slattery et al. (2012) | 0.98304194(0.77480137-1.2472506) |                                  |        |
|                        | Combined               | 0.97685901(0.83481723-1.1430688) |                                  |        |

---

**Supplementary table 3. *P* values of the Egger's test for *TLR2* polymorphism.**

| <b>Polymorphisms</b> | <b>Subgroup</b> | <b>Egger's test <math>P &gt;  t </math></b> |
|----------------------|-----------------|---------------------------------------------|
| (-196 to -174del)    | Overall         | 0.291                                       |
|                      | Asian           | 0.593                                       |
|                      | Caucasian       | 0.983                                       |
|                      | African         | 0.889                                       |
|                      | PB              | 0.791                                       |
|                      | HB              | 0.598                                       |
|                      | Gastric Cancer  | 0.459                                       |
|                      | Breast cancer   | 0.768                                       |
|                      | Cervical cancer | 0.14                                        |
|                      | Y               | 0.261                                       |
|                      | N               | 0.108                                       |
| rs3804099            | Overall         | 0.991                                       |
|                      | Asian           | 0.772                                       |
|                      | Caucasian       | 0.405                                       |
|                      | PB              | 0.939                                       |
|                      | HB              | 0.94                                        |
|                      | Y               | 0.236                                       |
|                      | N               | 0.996                                       |
| rs3804100            | Overall         | 0.279                                       |
|                      | Asian           | 0.003                                       |
|                      | Caucasian       | 0.578                                       |
|                      | PB              | 0.423                                       |
|                      | HB              | 0.297                                       |
|                      | Y               | 0.312                                       |
| rs4696480            | Overall         | 0.937                                       |

|           |         |       |
|-----------|---------|-------|
|           | PB      | 0.553 |
|           | Y       | 0.029 |
| rs1898830 | Overall | 0.494 |

**Supplementary table 4. Details of the linkage disequilibrium analysis for disequilibrium analysis for TLR2 polymorphisms in populations from 1000**

**genomes Phase 3.**

| L1        | L2        | D'    | LOD   | R <sup>2</sup> | CI <sub>low</sub> | CI <sub>high</sub> | Dist  | T-int  |
|-----------|-----------|-------|-------|----------------|-------------------|--------------------|-------|--------|
| CHB+CHS   |           |       |       |                |                   |                    |       |        |
| rs4696480 | rs1898830 | 0.98  | 74.79 | 0.905          | 0.94              | 1                  | 1327  | 105.94 |
| rs4696480 | rs3804099 | 0.945 | 16.58 | 0.279          | 0.83              | 0.99               | 17530 | -      |
| rs4696480 | rs3804100 | 0.938 | 14.51 | 0.241          | 0.8               | 0.98               | 18283 | -      |
| rs4696480 | rs5743708 | 1     | 0.06  | 0.003          | 0.04              | 0.97               | 19191 | -      |
| rs1898830 | rs3804099 | 0.948 | 18.09 | 0.298          | 0.84              | 0.99               | 16203 | 64.48  |
| rs1898830 | rs3804100 | 0.94  | 15.19 | 0.257          | 0.81              | 0.99               | 16956 | -      |
| rs1898830 | rs5743708 | 1     | 0.05  | 0.003          | 0.04              | 0.97               | 17864 | -      |
| rs3804099 | rs3804100 | 0.987 | 58.89 | 0.853          | 0.94              | 1                  | 753   | 88.94  |
| rs3804099 | rs5743708 | 1     | 0.24  | 0.006          | 0.05              | 0.97               | 1661  | -      |
| rs3804100 | rs5743708 | 1     | 0.28  | 0.007          | 0.06              | 0.98               | 908   | 0.63   |
| CEU       |           |       |       |                |                   |                    |       |        |
| rs4696480 | rs1898830 | 1     | 18.31 | 0.528          | 0.9               | 1                  | 1327  | 25.77  |
| rs4696480 | rs3804099 | 0.44  | 3.63  | 0.152          | 0.26              | 0.58               | 17530 | -      |
| rs4696480 | rs3804100 | 1     | 2.36  | 0.085          | 0.43              | 1                  | 18283 | -      |
| rs4696480 | rs5743708 | 1     | 1.47  | 0.047          | 0.25              | 1                  | 19191 | -      |
| rs1898830 | rs3804099 | 1     | 13.87 | 0.415          | 0.88              | 1                  | 16203 | 25.14  |
| rs1898830 | rs3804100 | 1     | 1.24  | 0.045          | 0.2               | 1                  | 16956 | -      |
| rs1898830 | rs5743708 | 1     | 2.57  | 0.088          | 0.45              | 1                  | 17864 | -      |
| rs3804099 | rs3804100 | 1     | 3.35  | 0.108          | 0.56              | 1                  | 753   | 12.02  |
| rs3804099 | rs5743708 | 1     | 1.03  | 0.037          | 0.16              | 0.99               | 1661  | -      |

|           |           |       |       |       |       |      |       |       |
|-----------|-----------|-------|-------|-------|-------|------|-------|-------|
| rs3804100 | rs5743708 | 0.635 | 0.03  | 0.002 | 0.04  | 0.96 | 908   | 5.1   |
| ESN       |           |       |       |       |       |      |       |       |
| rs4696480 | rs1898830 | 1     | 1.99  | 0.064 | 0.36  | 1    | 1327  | 3.42  |
| rs4696480 | rs3804099 | 0.008 | 0     | 0     | -0.01 | 0.22 | 17530 | -     |
| rs4696480 | rs3804100 | 1     | 1.43  | 0.075 | 0.24  | 1    | 18283 | -     |
| rs1898830 | rs3804099 | 1     | 4.89  | 0.154 | 0.67  | 1    | 16203 | 6.4   |
| rs1898830 | rs3804100 | 0.922 | 0.08  | 0.004 | 0.04  | 0.97 | 16956 | -     |
| rs3804099 | rs3804100 | 1     | 0.81  | 0.031 | 0.12  | 0.99 | 753   | 2.32  |
| JPT       |           |       |       |       |       |      |       |       |
| rs4696480 | rs1898830 | 1     | 42.41 | 1     | 0.97  | 1    | 1327  | 56.01 |
| rs4696480 | rs3804099 | 0.897 | 7     | 0.3   | 0.69  | 0.97 | 17530 | -     |
| rs4696480 | rs3804100 | 0.939 | 6.6   | 0.285 | 0.72  | 0.99 | 18283 | -     |
| rs1898830 | rs3804099 | 0.897 | 7     | 0.3   | 0.69  | 0.97 | 16203 | 27.2  |
| rs1898830 | rs3804100 | 0.939 | 6.6   | 0.285 | 0.72  | 0.99 | 16956 | -     |
| rs3804099 | rs3804100 | 1     | 29.6  | 0.864 | 0.93  | 1    | 753   | 42.8  |
| YRI       |           |       |       |       |       |      |       |       |
| rs4696480 | rs1898830 | 1     | 1.56  | 0.047 | 0.27  | 1    | 1327  | 5.39  |
| rs4696480 | rs3804099 | 0.004 | 0     | 0     | -0.01 | 0.19 | 17530 | -     |
| rs4696480 | rs3804100 | 1     | 3.83  | 0.117 | 0.6   | 1    | 18283 | -     |
| rs1898830 | rs3804099 | 1     | 3.4   | 0.122 | 0.57  | 1    | 16203 | 7.42  |
| rs1898830 | rs3804100 | 1     | 0.19  | 0.006 | 0.05  | 0.97 | 16956 | -     |
| rs3804099 | rs3804100 | 1     | 1.75  | 0.046 | 0.31  | 1    | 753   | 5.77  |

The linkage disequilibrium values were calculated using  $r^2$  and  $D'$  statistic CI (Confidence Interval); LOD: Log odds score.

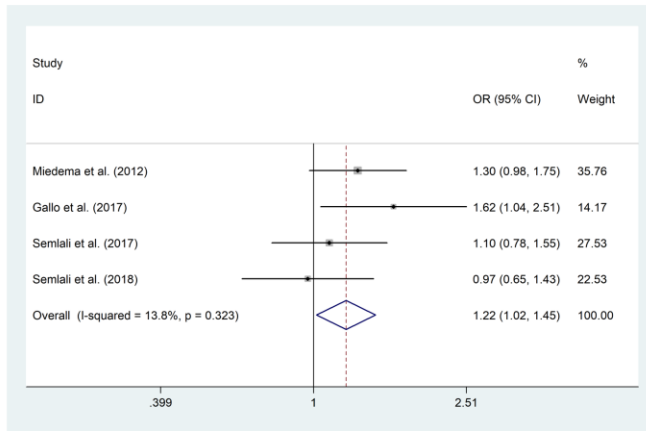

*B vs. A*

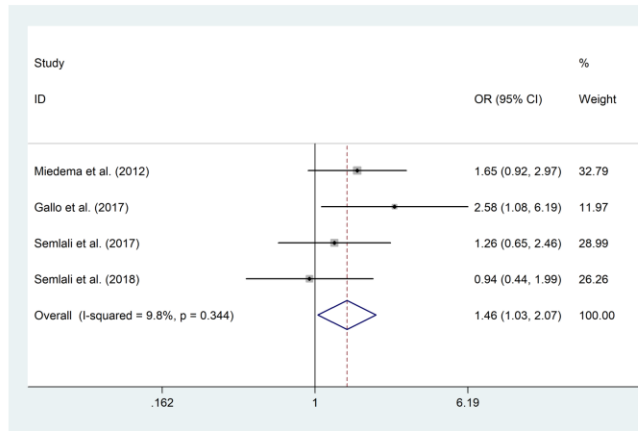

*BB vs. AA*

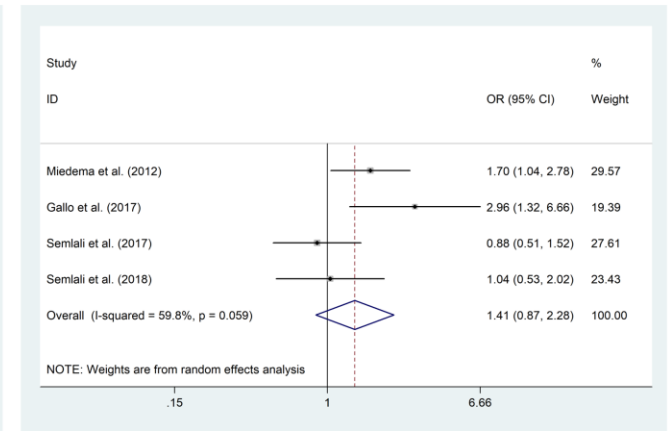

*BA vs. AA*

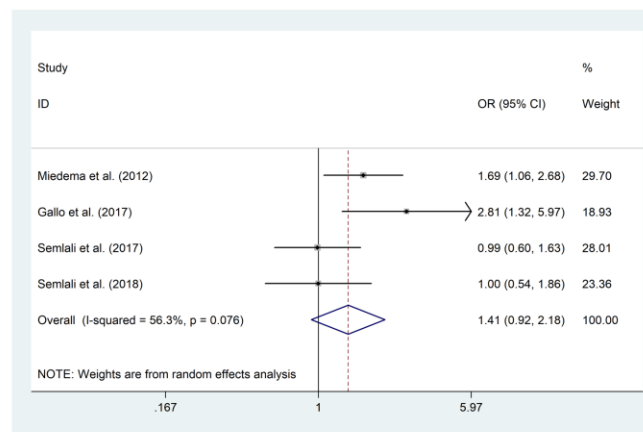

*BB+BA vs. AA*

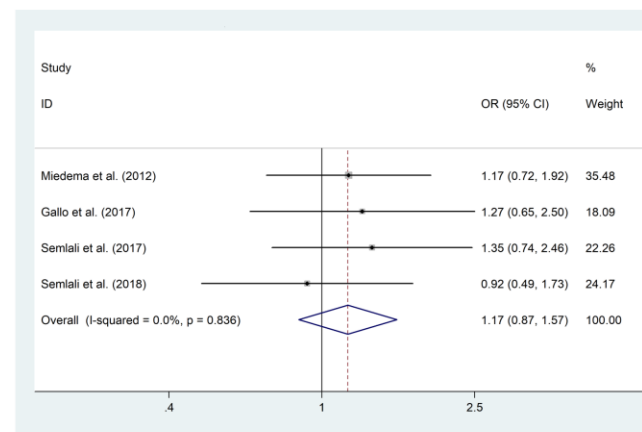

*BB vs. BA+AA*

Fig.S1 Meta-analysis of the association between *TLR2 rs4696480* polymorphism and cancer risk.

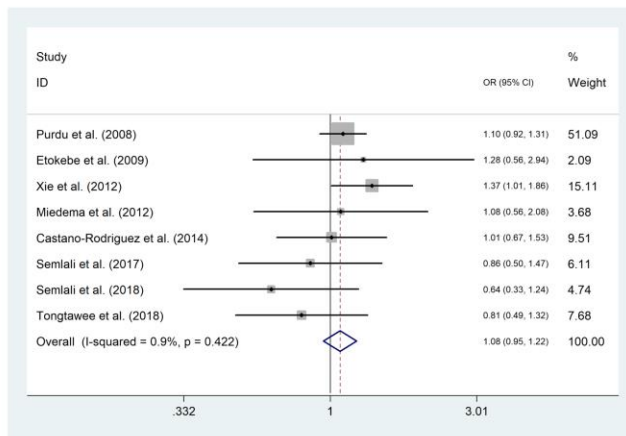

*B vs. A*

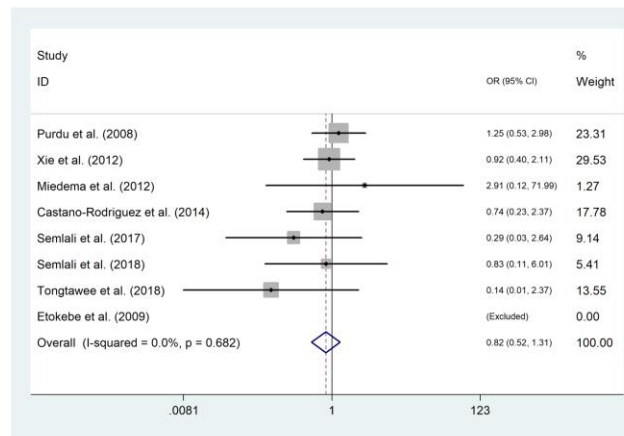

*BB vs. AA*

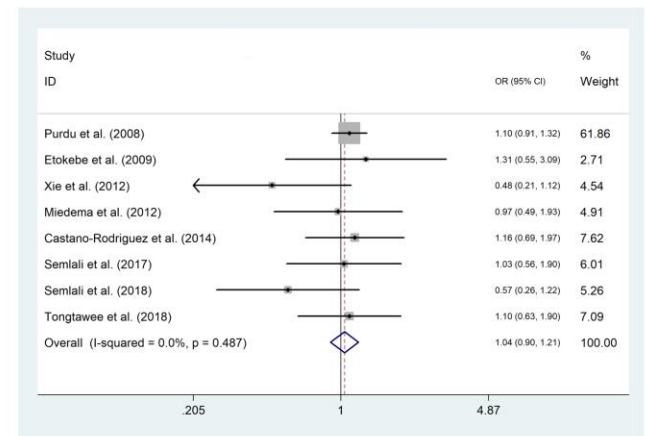

*BA vs. AA*

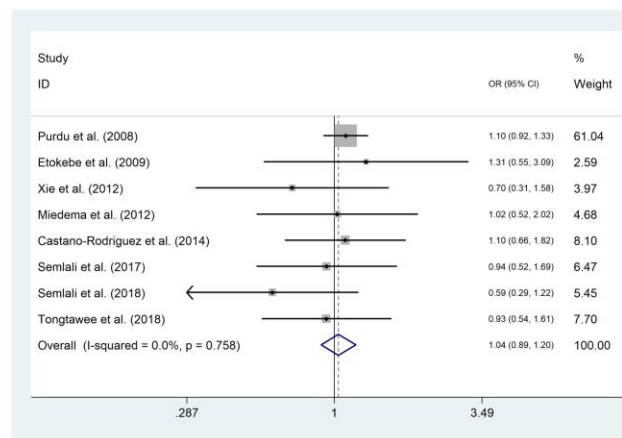

*BB+BA vs. AA*

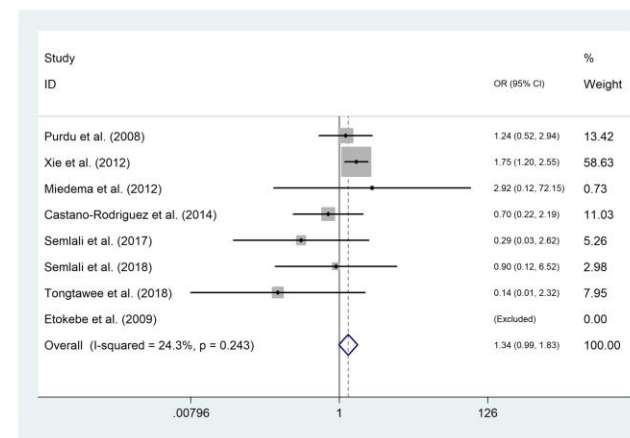

*BB vs. BA+AA*

Fig.S2 Meta-analysis of the association between *TLR2 rs3804100* polymorphism and cancer risk.

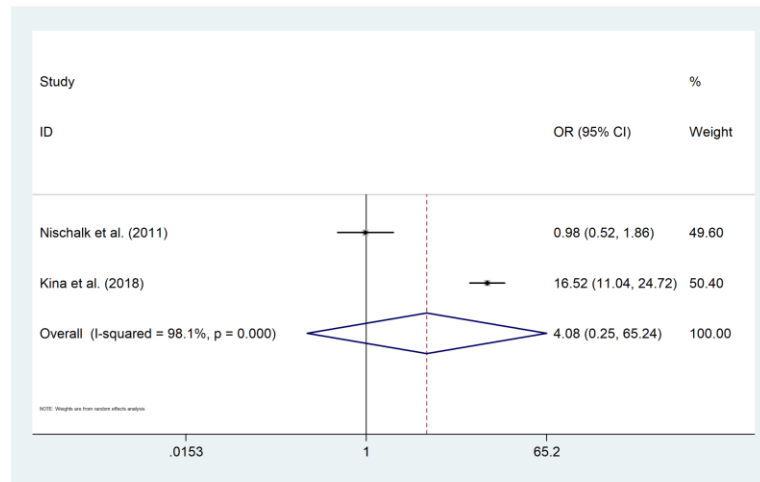

*B vs. A*

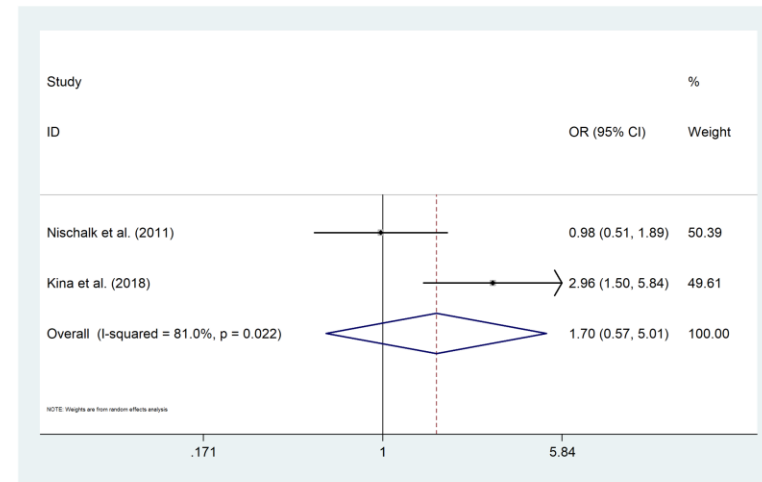

*BA vs. AA*

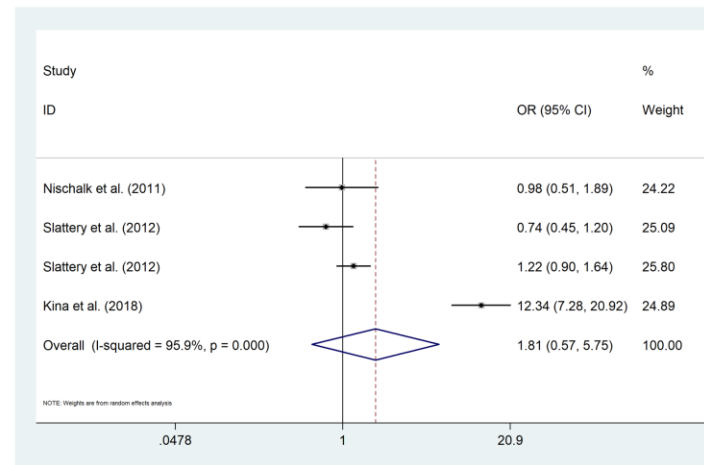

*BB+BA vs. AA*

Fig.S3 Meta-analysis of the association between *TLR2 rs5743708* polymorphism and cancer risk.



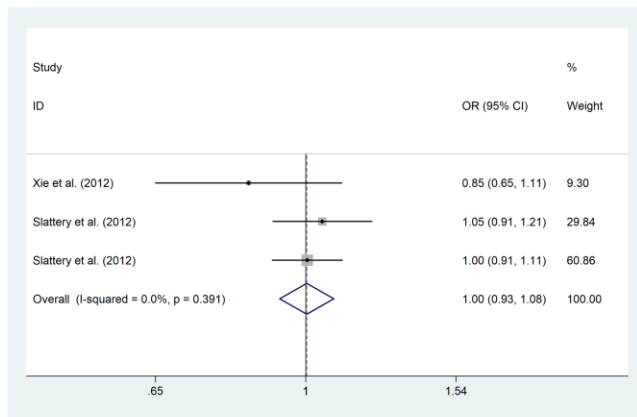

*B vs. A*

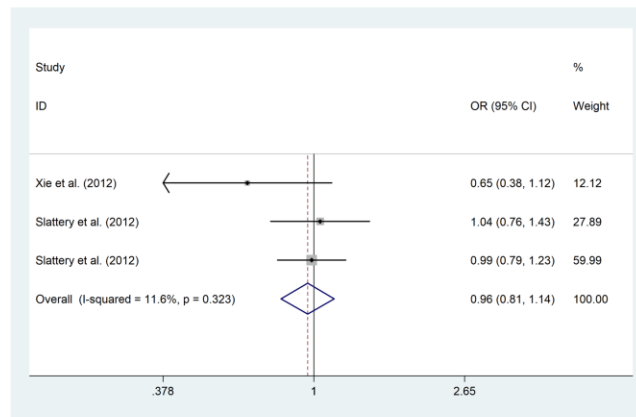

*BB vs. AA*

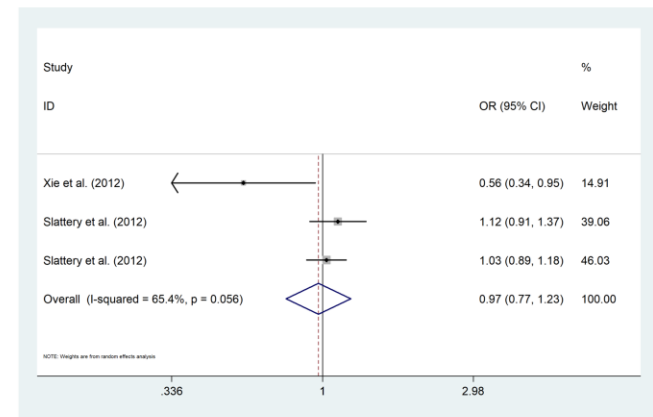

*BA vs. AA*

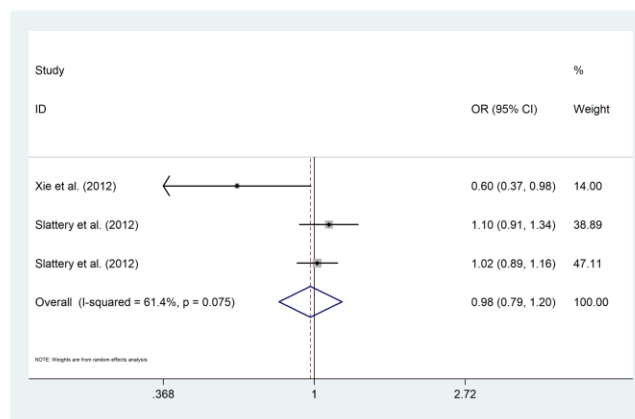

*BB+BA vs. AA*

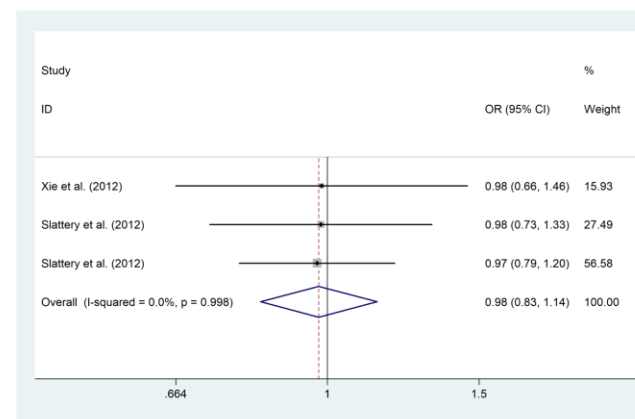

*BB vs. BA+AA*

Fig.S4 Meta-analysis of the association between *TLR2 rs1898830* polymorphism and cancer risk.

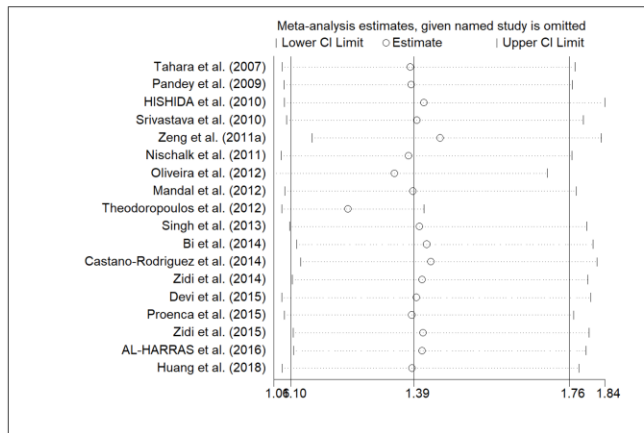

*-196 to -174 del*

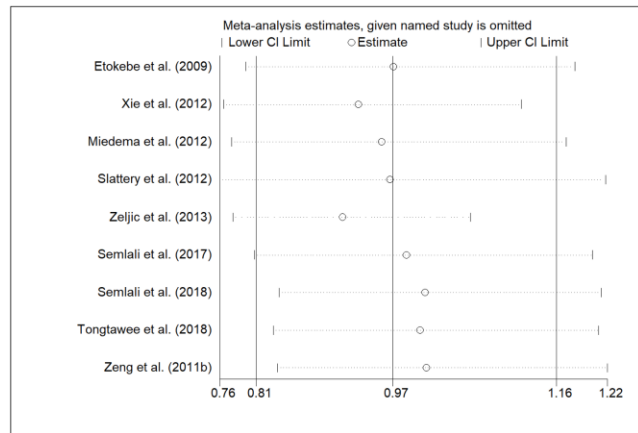

*rs3804099*

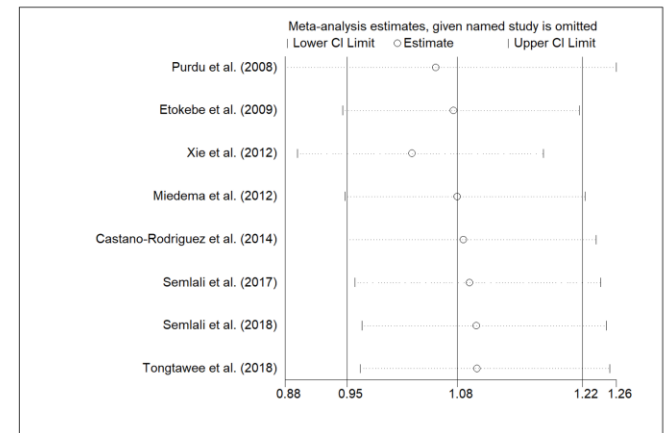

*rs3804100*

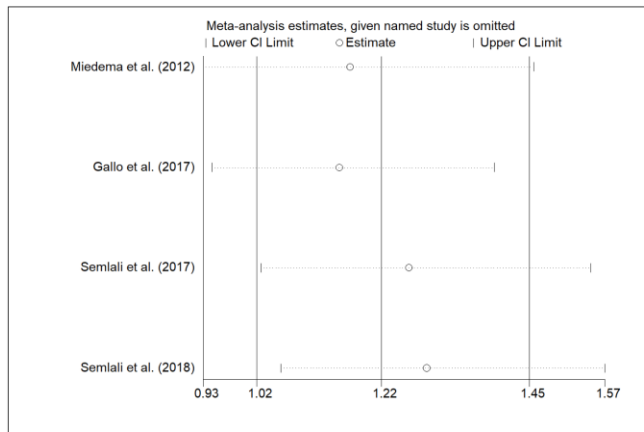

*rs4696480*

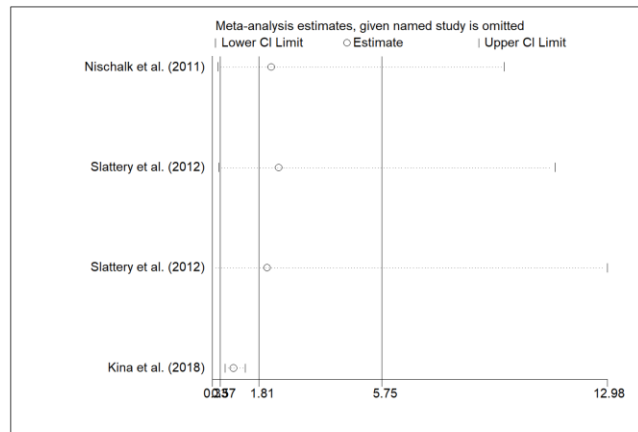

*rs5743708*

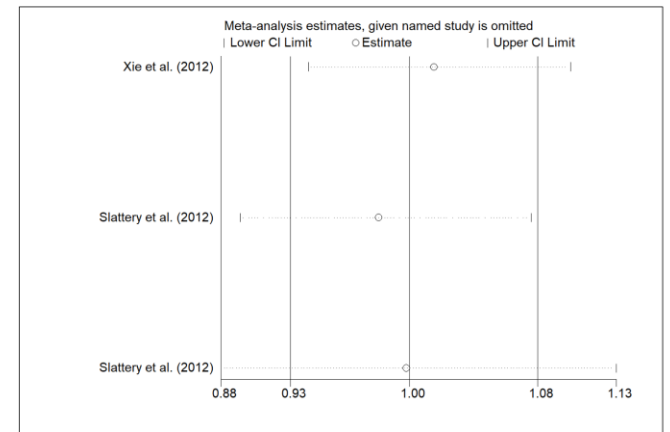

*rs1898830*

Fig.S5 Sensitivity analysis for TLR2 polymorphism and overall cancer susceptibility (B vs. A, rs5743708, BB+BA vs. AA)

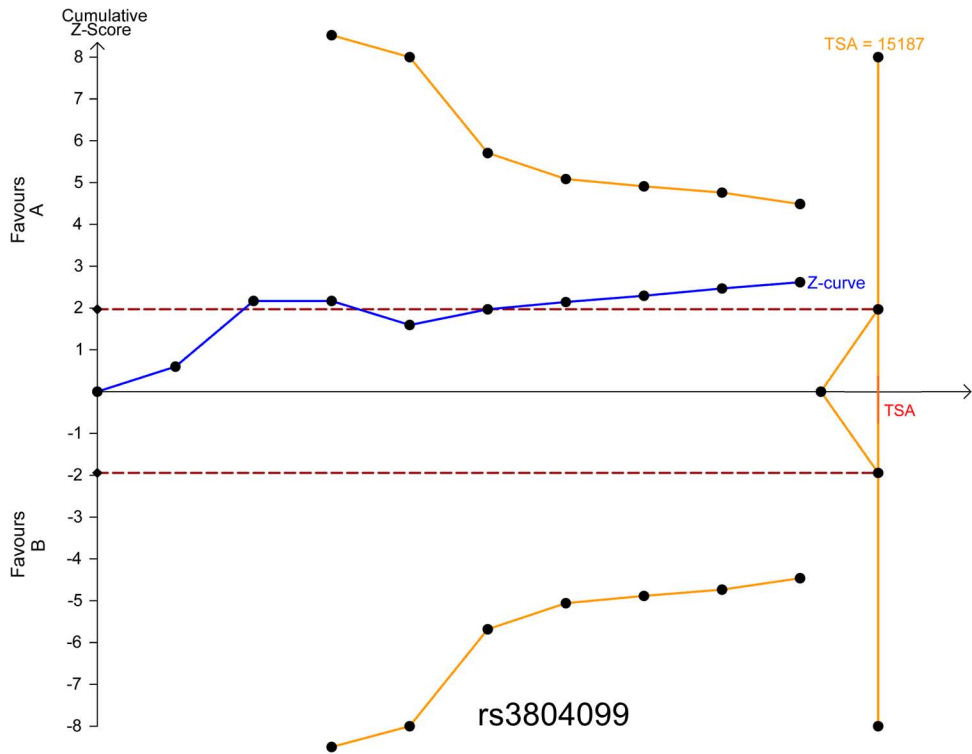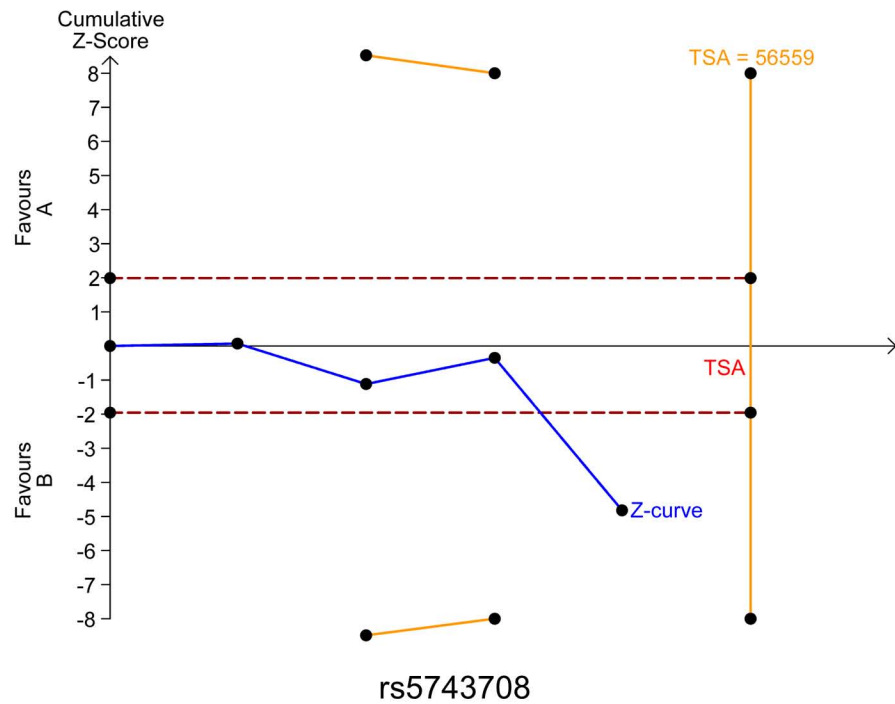

**Fig. S6. Trial sequential analysis for *TLR2* polymorphism (rs3804099, rs5743708) under the allele contrast model (B vs. A).**
